# Supplementary material for: eHealth Literacy of German Physicians in the Pre–COVID-19 Era: Questionnaire Study
Source: PubMed Central journal article supplement (PMC7600010; doi:10.2196/20099), 2020-10-16
Supplement: mhealth_v8i10e20099_app1.pdf [file mhealth_v8i10e20099_app1.pdf]

# University Hospital Carl Gustav Carus

## Clinic and Polyclinic for Visceral, Thoracic and Vascular Surgery

Clinic director: Prof. Dr. Jürgen Weitz

University Hospital Carl Gustav Carus - Fetscherstr. 74 - 01307 Dresden

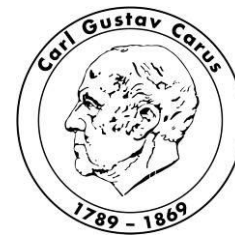

Dear Colleague

New information and communication technologies (ICT), such as smartphones, apps and cloud services, are changing our private and professional everyday life forever. ICT applications, such as health apps on the smartphone, are also being used more and more frequently in the healthcare sector.

At the same time, there are many ambiguities related to the use of these technologies and applications, in particular regarding the reliability of information, security and privacy aspects.

The purpose of this survey is to get an overview of the actual use by physicians, the existing knowledge about these technologies and the evaluation of possible practical applications.

Answering the questions should not take more than 5-10 minutes. We would like to thank you very much for your assistance by filling in the anonymous questionnaire.

Your  
Ulrich Bork

If you have any further questions about the project, I am available for you questions:

PD Dr. Ulrich Bork  
University Hospital Dresden

### Data protection notice:

---

This survey is anonymous. This means that at no time will your personal data, such as name, date of birth, etc. be revealed. The survey is multi-centered and the evaluation is carried out for all locations together, i.e. it is not possible to draw conclusions about individual persons even by assigning the personal data. Data collected in the course of this study will be recorded and further evaluated anonymously.

**Personal details****Your age (in years) and sex:**

- |                                  |                                  |                                 |
|----------------------------------|----------------------------------|---------------------------------|
| <input type="checkbox"/> < 30    | <input type="checkbox"/> 30 - 45 | <input type="checkbox"/> male   |
| <input type="checkbox"/> 45 - 60 | <input type="checkbox"/> > 60    | <input type="checkbox"/> female |

**length of professional activity (in years):**

- |                                  |                                 |
|----------------------------------|---------------------------------|
| <input type="checkbox"/> < 5     | <input type="checkbox"/> 5 - 15 |
| <input type="checkbox"/> 15 - 25 | <input type="checkbox"/> > 25   |

**Highest academic degree:**

- |                                            |                                    |
|--------------------------------------------|------------------------------------|
| <input type="checkbox"/> State Examination | <input type="checkbox"/> PhD       |
| <input type="checkbox"/> Dr. (M.D.)        | <input type="checkbox"/> professor |

**Specialist board certification:**

- |                              |                             |
|------------------------------|-----------------------------|
| <input type="checkbox"/> yes | <input type="checkbox"/> no |
|------------------------------|-----------------------------|

**Questions about mobile phone (in the following mobile phone) and smartphone:****Do you use your own private mobile phone?**

- |                              |                             |
|------------------------------|-----------------------------|
| <input type="checkbox"/> yes | <input type="checkbox"/> no |
|------------------------------|-----------------------------|

**Do you usually carry your mobile phone with you at work?**

- |                              |                             |
|------------------------------|-----------------------------|
| <input type="checkbox"/> yes | <input type="checkbox"/> no |
|------------------------------|-----------------------------|

**Do you use an official mobile phone (provided by your employer)?**

- |                              |                             |
|------------------------------|-----------------------------|
| <input type="checkbox"/> yes | <input type="checkbox"/> no |
|------------------------------|-----------------------------|

**How often do you also use your private mobile phone for business purposes (e.g. call service, apps)?**

- |                                |                                  |                                 |                                |
|--------------------------------|----------------------------------|---------------------------------|--------------------------------|
| <input type="checkbox"/> never | <input type="checkbox"/> monthly | <input type="checkbox"/> weekly | <input type="checkbox"/> daily |
|--------------------------------|----------------------------------|---------------------------------|--------------------------------|

**Is your mobile phone a smartphone?**

- |                              |                             |                                       |
|------------------------------|-----------------------------|---------------------------------------|
| <input type="checkbox"/> yes | <input type="checkbox"/> no | <input type="checkbox"/> I don't know |
|------------------------------|-----------------------------|---------------------------------------|

**What operating system does your smartphone use?**

- |                                      |                                  |                                |                                                         |
|--------------------------------------|----------------------------------|--------------------------------|---------------------------------------------------------|
| <input type="checkbox"/> Apple (iOS) | <input type="checkbox"/> Android | <input type="checkbox"/> Other | <input type="checkbox"/> I do not know / not applicable |
|--------------------------------------|----------------------------------|--------------------------------|---------------------------------------------------------|

**Do you have/use a fitness wristband or similar "connected device":**

- No
- Fitness bracelet
- other connected device (e.g. Smart Watch)

**What do you use your mobile phone / smartphone for (multiple answers possible):**

- Phone calls, SMS
- Messenger (e.g. WhatsApp)
- Social media (e.g. Facebook)
- web browsing
- Route planner / navigation (e.g. Google Maps)
- Online Banking / Finances
- Medical tips / Health apps
- Games
- Other: \_\_\_\_\_

**Questions about the use of apps (if no use please tick "not applicable")**

Which of the points are important to you for privately used apps?

|                                        | Not important            | important                | Very important           | Not applicable           |
|----------------------------------------|--------------------------|--------------------------|--------------------------|--------------------------|
| Design and usability                   | <input type="checkbox"/> | <input type="checkbox"/> | <input type="checkbox"/> | <input type="checkbox"/> |
| Time saving through use                | <input type="checkbox"/> | <input type="checkbox"/> | <input type="checkbox"/> | <input type="checkbox"/> |
| Privacy / Security                     | <input type="checkbox"/> | <input type="checkbox"/> | <input type="checkbox"/> | <input type="checkbox"/> |
| Friends / families use the same app    | <input type="checkbox"/> | <input type="checkbox"/> | <input type="checkbox"/> | <input type="checkbox"/> |
| Image of the manufacturer / supplier   | <input type="checkbox"/> | <input type="checkbox"/> | <input type="checkbox"/> | <input type="checkbox"/> |
| Quality and topicality of the contents | <input type="checkbox"/> | <input type="checkbox"/> | <input type="checkbox"/> | <input type="checkbox"/> |
| Fun factor                             | <input type="checkbox"/> | <input type="checkbox"/> | <input type="checkbox"/> | <input type="checkbox"/> |

Which of the points are important to you for apps used for business purposes?

|                                        | Not important            | important                | Very important           | Not applicable           |
|----------------------------------------|--------------------------|--------------------------|--------------------------|--------------------------|
| Design and usability                   | <input type="checkbox"/> | <input type="checkbox"/> | <input type="checkbox"/> | <input type="checkbox"/> |
| Time saving through use                | <input type="checkbox"/> | <input type="checkbox"/> | <input type="checkbox"/> | <input type="checkbox"/> |
| Privacy / Security                     | <input type="checkbox"/> | <input type="checkbox"/> | <input type="checkbox"/> | <input type="checkbox"/> |
| Friends / families use the same app    | <input type="checkbox"/> | <input type="checkbox"/> | <input type="checkbox"/> | <input type="checkbox"/> |
| Image of the manufacturer / supplier   | <input type="checkbox"/> | <input type="checkbox"/> | <input type="checkbox"/> | <input type="checkbox"/> |
| Quality and topicality of the contents | <input type="checkbox"/> | <input type="checkbox"/> | <input type="checkbox"/> | <input type="checkbox"/> |
| Fun factor                             | <input type="checkbox"/> | <input type="checkbox"/> | <input type="checkbox"/> | <input type="checkbox"/> |

Do you use medical apps in the context of your everyday work?

yes                       no                       I don't know

**How do you rate the following medical apps / applications for patients?**

|                                                                 | Good idea                | possible                 | Bad idea                 |
|-----------------------------------------------------------------|--------------------------|--------------------------|--------------------------|
| 1. Emergency App (e.g. by a panel doctor on call)               | <input type="checkbox"/> | <input type="checkbox"/> | <input type="checkbox"/> |
| 2. Online appointment allocation / appointment coordination app | <input type="checkbox"/> | <input type="checkbox"/> | <input type="checkbox"/> |
| 3. Coaching / training on diseases                              | <input type="checkbox"/> | <input type="checkbox"/> | <input type="checkbox"/> |
| 4. Video consultation / digital health assistant                | <input type="checkbox"/> | <input type="checkbox"/> | <input type="checkbox"/> |
| 5. Aftercare app (e.g. postoperative or for malignancies)       | <input type="checkbox"/> | <input type="checkbox"/> | <input type="checkbox"/> |
| 6. Medication app (e.g. insulin regimen)                        | <input type="checkbox"/> | <input type="checkbox"/> | <input type="checkbox"/> |

**How do you rate the following medical apps / applications for doctors?**

|                                                    | Good idea                | possible                 | Bad idea                 |
|----------------------------------------------------|--------------------------|--------------------------|--------------------------|
| 1. Assistance Diagnostics / differential diagnosis | <input type="checkbox"/> | <input type="checkbox"/> | <input type="checkbox"/> |
| 2. Guideline presentation                          | <input type="checkbox"/> | <input type="checkbox"/> | <input type="checkbox"/> |
| 3. Digital patient file                            | <input type="checkbox"/> | <input type="checkbox"/> | <input type="checkbox"/> |
| 4. Drug application (e.g. yellow list, embryotox)  | <input type="checkbox"/> | <input type="checkbox"/> | <input type="checkbox"/> |
| 5. Documentation / visit assistance                | <input type="checkbox"/> | <input type="checkbox"/> | <input type="checkbox"/> |

**General questions on information and communication technology (ICT)**

**Do you think it is basically justifiable to use normal messenger apps (e.g. WhatsApp) for professional communication?**

yes  no  I don't know

**Are you familiar with secure messenger apps (e.g. Siilo, Careflow Connect, MedCrowd) for professional communication?**

Yes  no

**Do you think cloud computing based technologies for professional communication / data exchange make sense?**

Yes  no  I don't know

**Do you consider professional communication in the health sector via normal email to be sufficiently secure and reliable?**

Yes  no  I don't know

**Would you say that you are sufficiently familiar with the technical side of apps and cloud computing to assess their use in everyday clinical practice?**

Yes  No  I don't know

**Would you say that you are sufficiently familiar with the legal aspects and data protection requirements of apps and cloud computing to assess their use in everyday clinical practice?**

Yes  no  I don't know

**Do you use telemedical applications (e.g. external diagnostic reports) in your professional activities?**

Yes  no  I don't know

**Have you already received queries from patients about health advice or comparable applications in the course of your professional activities?**

Yes  No  I don't know

**If a health app for patients interferes with diagnostics and therapy (e.g. contraception app, insulin scheme app), do you think it should be approved as a medical device?**

Yes  No  I don't know

**In your opinion, what percentage of the apps that can currently be downloaded from the popular App Stores meet at least adequate basic data protection standards for secure communication and data storage?**

< 30 %  30-60%  >60%

**Do you consider mandatory certification by an independent third party for health care applications / medical ICT applications to be necessary?**

**A) With regard to security and data protection**

Yes  No  I don't know

**B) In terms of medical efficacy/quality of content**

Yes  No  I don't know

**Your comments (free text):**

---

---
